# Supplementary material
Source: publisher figshare collection journal article supplement (https://acs.figshare.com/ndownloader/files/24183778)
Supplement: Supplementary file 1 [file 24183778]

Supplementary Information to:

## **Evaluation of optimized procedures for high-precision Pb isotope analyses of seawater by MC-ICP-MS**

**Alex Griffiths \*** – MAGIC Group, Department of Earth Science and Engineering, Imperial College London, South Kensington Campus, London, SW7 2AZ, U.K.; email: a.griffiths15@imperial.ac.uk

**Hollie Packman** – MAGIC Group, Department of Earth Science and Engineering, Imperial College London, South Kensington Campus, London, SW7 2AZ, U.K.; email: h.packman17@imperial.ac.uk

**Yee-Lap Leung** – MAGIC Group, Department of Earth Science and Engineering, Imperial College London, South Kensington Campus, London, SW7 2AZ, U.K.; email: yee.leung14@imperial.ac.uk

**Barry J. Coles** – MAGIC Group, Department of Earth Science and Engineering, Imperial College London, South Kensington Campus, London, SW7 2AZ, U.K.; email: b.coles@imperial.ac.uk

**Katharina Kreissig** – MAGIC Group, Department of Earth Science and Engineering, Imperial College London, South Kensington Campus, London, SW7 2AZ, U.K.; email: k.kreissig@imperial.ac.uk

**Susan H. Little** – Department of Earth Sciences, University College London, Gower Street, London, WC1E 6BT, U.K.; email: susan.little@ucl.ac.uk

**Tina van de Flierdt** – MAGIC Group, Department of Earth Science and Engineering, Imperial College London, South Kensington Campus, London, SW7 2AZ, U.K.; email: tina.vandeflierdt@imperial.ac.uk

**Mark Rehkämper** – MAGIC Group, Department of Earth Science and Engineering, Imperial College London, South Kensington Campus, London, SW7 2AZ, U.K.; email: markrehk@imperial.ac.uk

## **Table of Contents**

|                                                                                                                                                                                                                              |    |
|------------------------------------------------------------------------------------------------------------------------------------------------------------------------------------------------------------------------------|----|
| <b>Table S1.</b> Column chemistry procedures using AG1-X8 resin for the purification of Pb separated from seawater for IC and ID measurements by MC-ICP-MS .....                                                             | S3 |
| <b>Table S2.</b> Instrumental parameters for the Nu Plasma II MC-ICP-MS used for Pb isotope measurements.....                                                                                                                | S4 |
| <b>Table S3.</b> Lead isotope data for NIST SRM 981 measured in this study using either a $^{207}\text{Pb}$ – $^{204}\text{Pb}$ double-spike or Tl-normalization for the correction of instrumental mass fractionation ..... | S5 |
| <b>Table S4.</b> Lead isotope compositions and concentrations determined for in-house quality control materials following different Pb separation and mass bias correction procedures.....                                   | S6 |
| <b>Table S5.</b> Lead isotope compositions and concentrations determined for GEOTRACES intercalibration samples following different Pb separation and mass bias correction procedures .....                                  | S7 |
| <b>References</b> .....                                                                                                                                                                                                      | S8 |

**Table S1.** Column chemistry procedures using AG1-X8 resin for the purification of Pb separated from seawater for isotope composition (IC) and isotope dilution (ID) measurements by MC-ICP-MS.

| Purpose           | Pb IC chemistry                                         | Pb ID chemistry                                         |
|-------------------|---------------------------------------------------------|---------------------------------------------------------|
|                   | 200 $\mu$ L AG1-X8 (100–200 mesh)                       | 20 $\mu$ L AG1-X8 (100–200 mesh)                        |
| Clean resin       | 3 $\times$ 3 mL<br>0.1 M HNO <sub>3</sub>               | 3 $\times$ 1 mL<br>0.1 M HNO <sub>3</sub>               |
| Equilibrate resin | 2 $\times$ 0.1 mL<br>2 M HBr (+ 0.01 M HF) <sup>a</sup> | 2 $\times$ 0.1 mL<br>0.5 M HBr + 0.2 M HNO <sub>3</sub> |
| Load sample       | ~5 mL<br>2 M HBr (+ 0.01 M HF) <sup>a</sup>             | 2 mL<br>0.5 M HBr + 0.2 M HNO <sub>3</sub>              |
| Elute matrix      | 2 $\times$ 0.1 mL<br>2 M HBr (+ 0.01 M HF) <sup>a</sup> | 2 $\times$ 0.3 mL<br>0.5 M HBr + 0.2 M HNO <sub>3</sub> |
|                   | 2 $\times$ 0.5 mL<br>0.2 M HBr + 0.5 M HNO <sub>3</sub> |                                                         |
|                   | 0.2 mL<br>0.03 M HBr + 0.5 M HNO <sub>3</sub>           |                                                         |
|                   |                                                         |                                                         |
| Elute Pb          | 3 mL<br>0.03 M HBr + 0.5 M HNO <sub>3</sub>             | 1 mL<br>0.03 M HBr + 0.5 M HNO <sub>3</sub>             |

<sup>a</sup> During the first stage of Pb IC chemistry, the solutions used to equilibrate the resin, load the sample and initiate the elution of the matrix contained a HBr + HF mixture. These steps for the second stage of Pb IC chemistry employed HBr with no HF.

**Table S2.** Instrumental parameters for the Nu Plasma II MC-ICP-MS used for Pb isotope measurements.

---

**Nu Plasma II MC-ICP-MS**

|                          |                                        |
|--------------------------|----------------------------------------|
| RF Power                 | 1300 W                                 |
| Acceleration potential   | 6000 V                                 |
| Ar coolant gas flow      | 13 L min <sup>-1</sup>                 |
| Ar auxiliary gas flow    | 1 L min <sup>-1</sup>                  |
| Expansion chamber vacuum | ~0.75 mbar                             |
| Analyser vacuum          | ~2 × 10 <sup>-9</sup> mbar             |
| Faraday cup resistors    | 10 <sup>11</sup> Ω, 10 <sup>12</sup> Ω |
| Sensitivity for Pb       | ~1500 V (μg/mL) <sup>-1</sup>          |

**Nu Instrument DSN-100 desolvating nebulizer system**

|                           |                               |
|---------------------------|-------------------------------|
| Spray chamber temperature | 110°C                         |
| Desolvator temperature    | 160°C                         |
| Argon sweep gas           | ~3.4 to 5 L min <sup>-1</sup> |
| Nebuliser pressure        | ~60 psi                       |
| Sample uptake rate        | ~140 μL min <sup>-1</sup>     |

---

**Table S3.** Lead isotope data for NIST SRM 981 measured in this study using either a  $^{207}\text{Pb}$ – $^{204}\text{Pb}$  double-spike or Tl-normalization for the correction of instrumental mass fractionation. Literature data for NIST SRM 981 Pb acquired by TIMS or MC-ICP-MS and Pb poly-spikes are shown for comparison.

| Standard/ Reference                                                 | Pb (Tl)<br>(ng) <sup>a</sup> | <i>n</i> <sup>b</sup> | Mass bias correction                                         | $^{206}\text{Pb}/^{204}\text{Pb}$<br>± 2SD <sup>c</sup> | $^{207}\text{Pb}/^{204}\text{Pb}$<br>± 2SD <sup>c</sup> | $^{208}\text{Pb}/^{204}\text{Pb}$<br>± 2SD <sup>c</sup> | $^{206}\text{Pb}/^{207}\text{Pb}$<br>± 2SD <sup>c</sup> | $^{208}\text{Pb}/^{207}\text{Pb}$<br>± 2SD <sup>c</sup> |
|---------------------------------------------------------------------|------------------------------|-----------------------|--------------------------------------------------------------|---------------------------------------------------------|---------------------------------------------------------|---------------------------------------------------------|---------------------------------------------------------|---------------------------------------------------------|
| SRM 981 Pb - SRM 997 Tl                                             | 1 (3)                        | 54                    | $^{207}\text{Pb}$ – $^{204}\text{Pb}$ DS                     | 16.927 ± 17                                             | 15.486 ± 18                                             | 36.688 ± 50                                             | 1.0931 ± 03                                             | 2.3691 ± 05                                             |
|                                                                     |                              |                       | ± 2SD rel. (ppm) <sup>c</sup>                                | 1020                                                    | 1190                                                    | 1360                                                    | 280                                                     | 220                                                     |
|                                                                     |                              |                       | ± 2SE rel. (ppm) <sup>d</sup>                                | 260                                                     | 290                                                     | 340                                                     | 70                                                      | 70                                                      |
|                                                                     |                              |                       | Tl-normalization                                             | 16.935 ± 09                                             | 15.497 ± 08                                             | 36.723 ± 19                                             | 1.0928 ± 03                                             | 2.3697 ± 05                                             |
|                                                                     |                              |                       | ± 2SD rel. (ppm) <sup>c</sup>                                | 550                                                     | 490                                                     | 520                                                     | 250                                                     | 200                                                     |
|                                                                     |                              |                       | ± 2SE rel. (ppm) <sup>d</sup>                                | 210                                                     | 220                                                     | 220                                                     | 40                                                      | 30                                                      |
| SRM 981 Pb - SRM 997 Tl                                             | 7 (21)                       | 30                    | $^{207}\text{Pb}$ – $^{204}\text{Pb}$ DS                     | 16.9332 ± 57                                            | 15.4915 ± 71                                            | 36.6995 ± 206                                           | 1.0931 ± 01                                             | 2.3690 ± 03                                             |
|                                                                     |                              |                       | ± 2SD rel. (ppm) <sup>c</sup>                                | 340                                                     | 460                                                     | 560                                                     | 140                                                     | 140                                                     |
|                                                                     |                              |                       | ± 2SE rel. (ppm) <sup>d</sup>                                | 80                                                      | 100                                                     | 120                                                     | 25                                                      | 30                                                      |
|                                                                     |                              |                       | Tl-normalization                                             | 16.9383 ± 23                                            | 15.4984 ± 23                                            | 36.7211 ± 52                                            | 1.0929 ± 01                                             | 2.3694 ± 02                                             |
|                                                                     |                              |                       | ± 2SD rel. (ppm) <sup>c</sup>                                | 140                                                     | 150                                                     | 140                                                     | 55                                                      | 100                                                     |
|                                                                     |                              |                       | ± 2SE rel. (ppm) <sup>d</sup>                                | 60                                                      | 70                                                      | 90                                                      | 10                                                      | 20                                                      |
| Paul et al., (2015) and Bridgestock (2015) <sup>1,2</sup><br>(TIMS) | 2                            | 59                    | $^{207}\text{Pb}$ – $^{204}\text{Pb}$ DS                     | 16.941 ± 20                                             | 15.495 ± 15                                             | 36.713 ± 39                                             | 1.0934 ± 02                                             | 2.3695 ± 03                                             |
|                                                                     |                              |                       | ± 2SD rel. (ppm) <sup>c</sup>                                | 950                                                     | 1000                                                    | 1070                                                    | 190                                                     | 130                                                     |
|                                                                     |                              |                       | ± 2SE rel. (ppm) <sup>d</sup>                                | 400                                                     | 420                                                     | 440                                                     | 60                                                      | 50                                                      |
| Galer and Abouchami (1998) <sup>3</sup><br>(TIMS)                   | 10                           | 60                    | $^{207}\text{Pb}$ – $^{206}\text{Pb}$ – $^{204}\text{Pb}$ TS | 16.9405 ± 15                                            | 15.4963 ± 16                                            | 36.7219 ± 44                                            | 1.0932                                                  | 2.3697                                                  |
|                                                                     |                              |                       | ± 2SD rel. (ppm) <sup>c</sup>                                | 90                                                      | 100                                                     | 120                                                     |                                                         |                                                         |
| Literature average <sup>e</sup><br>(TIMS, MC-ICP-MS)                |                              |                       | Poly-spike                                                   | 16.9410 ± 11                                            | 15.4983 ± 29                                            | 36.7221 ± 69                                            | 1.0931 ± 03                                             | 2.3694 ± 04                                             |
|                                                                     |                              |                       | ± 2SD rel. (ppm) <sup>c</sup>                                | 60                                                      | 190                                                     | 190                                                     | 230                                                     | 150                                                     |

<sup>a</sup> Approximate mass of Pb used for a single Pb isotope measurement. <sup>b</sup> Number of analyses. <sup>c</sup> 2 x standard deviation (2SD) calculated from *n* analyses to characterize the long-term reproducibility of the NIST SRM 981 Pb measurements, with the relative 2SD (ppm) provided below. <sup>d</sup> 2 x standard relative error (2SE) of the mean based on results for the individual measurement cycles to characterize the within-run reproducibility. <sup>e</sup> An average of recently published poly-spike NIST SRM 981 Pb data obtained by updating the values provided by Taylor et al., (2015)<sup>4</sup> with recent studies from Paul et al., (2015),<sup>1</sup> Bridgestock (2015),<sup>2</sup> Klaver et al., (2016)<sup>5</sup> and Fukami et al., (2017).<sup>6</sup> For Fukami et al., (2017), the TIMS procedure with most replicate NIST SRM 981 Pb analyses (*n* = 15) was used to update the poly-spike reference values (for more details, see text and Figure 1a and b).

**Table S4.** Lead isotope compositions and concentrations determined for in-house quality control materials following different Pb separation and mass bias correction procedures.

| Sample                        | Pb separation | Mass bias corr. | <i>n</i> - IC <sup>a</sup> | <sup>206</sup> Pb/ <sup>204</sup> Pb ± 2SD <sup>b</sup> | <sup>207</sup> Pb/ <sup>204</sup> Pb ± 2SD <sup>b</sup> | <sup>208</sup> Pb/ <sup>204</sup> Pb ± 2SD <sup>b</sup> | <sup>206</sup> Pb/ <sup>207</sup> Pb ± 2SD <sup>b</sup> | <sup>208</sup> Pb/ <sup>207</sup> Pb ± 2SD <sup>b</sup> | Sample size (L) <sup>d</sup> | Meas. Pb (ng) <sup>e</sup> | Yield (mean) % <sup>f</sup> | <i>n</i> - ID <sup>a</sup> | [Pb] ± 1SD (pmol kg <sup>-1</sup> ) |
|-------------------------------|---------------|-----------------|----------------------------|---------------------------------------------------------|---------------------------------------------------------|---------------------------------------------------------|---------------------------------------------------------|---------------------------------------------------------|------------------------------|----------------------------|-----------------------------|----------------------------|-------------------------------------|
| <b>SO-145</b>                 | Nobias        | DS              | 7                          | 18.521 ± 23<br>1230                                     | 15.646 ± 08<br>490                                      | 38.257 ± 25<br>640                                      | 1.1837 ± 14<br>1210                                     | 2.4452 ± 08<br>320                                      | ~2                           | 1.5                        | 63–121 (80)                 | 5                          | 7.0 ± 1.2                           |
| ± 2SD rel. (ppm) <sup>b</sup> |               |                 |                            | 120                                                     | 140                                                     | 160                                                     | 40                                                      | 30                                                      |                              |                            |                             |                            |                                     |
| ± 2SE run (ppm) <sup>c</sup>  | Nobias        | TI              | 7                          | 18.525 ± 25<br>1330                                     | 15.651 ± 10<br>610                                      | 38.275 ± 36<br>930                                      | 1.1836 ± 14<br>1160                                     | 2.4455 ± 10<br>410                                      |                              |                            |                             |                            |                                     |
| ± 2SD rel. (ppm) <sup>b</sup> |               |                 |                            | 110                                                     | 120                                                     | 130                                                     | 30                                                      | 30                                                      |                              |                            |                             |                            |                                     |
| ± 2SE rel. (ppm) <sup>c</sup> | co-precip.    | DS              | 2                          | 18.528 ± 02<br>18.527 ± 03                              | 15.652 ± 02<br>15.657 ± 03                              | 38.276 ± 07<br>38.288 ± 06                              | 1.1837 ± 00<br>1.1833 ± 00                              | 2.4454 ± 01<br>2.4455 ± 01                              | ~2                           | 1.4                        | 78–79 (79)                  |                            |                                     |
| ± 2SE run (ppm) <sup>c</sup>  |               |                 |                            | ~130                                                    | ~160                                                    | ~190                                                    | ~40                                                     | ~40                                                     |                              |                            |                             |                            |                                     |
|                               | co-precip.    | TI              | 2                          | 18.535 ± 02<br>18.530 ± 02                              | 15.662 ± 02<br>15.661 ± 03                              | 38.304 ± 06<br>38.301 ± 06                              | 1.1835 ± 00<br>1.1833 ± 00                              | 2.4458 ± 01<br>2.4457 ± 01                              |                              |                            |                             |                            |                                     |
| ± 2SE rel. (ppm) <sup>c</sup> |               |                 |                            | ~120                                                    | ~130                                                    | ~150                                                    | ~30                                                     | ~30                                                     |                              |                            |                             |                            |                                     |
| <b>SSW-5</b>                  | Nobias        | DS              | 5                          | 18.095 ± 04<br>240                                      | 15.608 ± 06<br>370                                      | 37.914 ± 17<br>450                                      | 1.1593 ± 02<br>150                                      | 2.4291 ± 03<br>100                                      | ~0.2                         | 7.0                        | 88–95 (92)                  | 7                          | 248.4 ± 2.0                         |
| ± 2SD rel. (ppm) <sup>b</sup> |               |                 |                            | 70                                                      | 70                                                      | 80                                                      | 20                                                      | 20                                                      |                              |                            |                             |                            |                                     |
| ± 2SE rel. (ppm) <sup>c</sup> | Nobias        | TI              | 5                          | 18.088 ± 05<br>300                                      | 15.600 ± 07<br>420                                      | 37.887 ± 21<br>540                                      | 1.1595 ± 02<br>160                                      | 2.4286 ± 03<br>120                                      |                              |                            |                             |                            |                                     |
| ± 2SD rel. (ppm) <sup>b</sup> |               |                 |                            | 70                                                      | 70                                                      | 80                                                      | 20                                                      | 20                                                      |                              |                            |                             |                            |                                     |
| ± 2SE rel. (ppm) <sup>c</sup> | co-precip.    | DS              | 7                          | 18.097 ± 05<br>270                                      | 15.611 ± 04<br>280                                      | 37.919 ± 15<br>410                                      | 1.1592 ± 03<br>240                                      | 2.4290 ± 04<br>170                                      | ~0.2                         | 4.0                        | 63–80 (73)                  |                            |                                     |
| ± 2SD rel. (ppm) <sup>b</sup> |               |                 |                            | 200                                                     | 240                                                     | 280                                                     | 60                                                      | 60                                                      |                              |                            |                             |                            |                                     |
| ± 2SE rel. (ppm) <sup>c</sup> | co-precip.    | TI              | 7                          | 18.087 ± 10<br>560                                      | 15.598 ± 10<br>640                                      | 37.876 ± 30<br>790                                      | 1.1596 ± 03<br>230                                      | 2.4283 ± 04<br>170                                      |                              |                            |                             |                            |                                     |
| ± 2SD rel. (ppm) <sup>b</sup> |               |                 |                            | 150                                                     | 150                                                     | 150                                                     | 20                                                      | 20                                                      |                              |                            |                             |                            |                                     |
| ± 2SE rel. (ppm) <sup>c</sup> |               |                 |                            |                                                         |                                                         |                                                         |                                                         |                                                         |                              |                            |                             |                            |                                     |
| <b>SSW-9</b>                  | Nobias        | DS              | 8                          | 17.914 ± 08<br>450                                      | 15.590 ± 08<br>530                                      | 37.819 ± 23<br>600                                      | 1.1491 ± 02<br>170                                      | 2.4259 ± 03<br>120                                      | ~0.2                         | 7.4                        | 69–95 (82)                  | 4                          | 352.9 ± 0.6                         |
| ± 2SD rel. (ppm) <sup>b</sup> |               |                 |                            | 70                                                      | 80                                                      | 100                                                     | 20                                                      | 20                                                      |                              |                            |                             |                            |                                     |
| ± 2SE rel. (ppm) <sup>c</sup> | Nobias        | TI              | 8                          | 17.915 ± 12<br>680                                      | 15.591 ± 15<br>930                                      | 37.821 ± 48<br>1280                                     | 1.1491 ± 03<br>290                                      | 2.4259 ± 09<br>360                                      |                              |                            |                             |                            |                                     |
| ± 2SD rel. (ppm) <sup>b</sup> |               |                 |                            | 70                                                      | 70                                                      | 80                                                      | 20                                                      | 20                                                      |                              |                            |                             |                            |                                     |
| ± 2SE rel. (ppm) <sup>c</sup> | co-precip.    | DS              | 5                          | 17.914 ± 05<br>250                                      | 15.598 ± 09<br>560                                      | 37.842 ± 30<br>800                                      | 1.1486 ± 03<br>280                                      | 2.4260 ± 04<br>180                                      | ~0.2                         | 6.9                        | 61–70 (66)                  |                            |                                     |
| ± 2SD rel. (ppm) <sup>b</sup> |               |                 |                            | 180                                                     | 210                                                     | 260                                                     | 60                                                      | 50                                                      |                              |                            |                             |                            |                                     |
| ± 2SE rel. (ppm) <sup>c</sup> | co-precip.    | TI              | 5                          | 17.904 ± 07<br>410                                      | 15.584 ± 12<br>760                                      | 37.796 ± 36<br>960                                      | 1.1489 ± 04<br>380                                      | 2.4253 ± 05<br>210                                      |                              |                            |                             |                            |                                     |
| ± 2SD rel. (ppm) <sup>b</sup> |               |                 |                            | 150                                                     | 150                                                     | 160                                                     | 20                                                      | 20                                                      |                              |                            |                             |                            |                                     |
| ± 2SE rel. (ppm) <sup>c</sup> |               |                 |                            |                                                         |                                                         |                                                         |                                                         |                                                         |                              |                            |                             |                            |                                     |

<sup>a</sup> Number of individual sample aliquots analysed for Pb isotope compositions or Pb concentrations using the ID technique. <sup>b</sup> 2 x standard deviation (2SD) calculated from individual results for *n* sample aliquots analysed across several batches of measurements (i.e., long-term reproducibility) with the relative 2SD (ppm) provided below; for samples with *n* ≤ 3, the individual data are provided and the error corresponds to 2 x standard error (2SE) of the mean based on individual results during measurement cycles (i.e., within-run reproducibility).

<sup>c</sup> The relative 2SE (ppm) of the mean based on the average 2SE of individual results during measurement cycles. <sup>d</sup> Volume of individual sample aliquots used for Pb isotope analyses.

<sup>e</sup> Mean mass of Pb in individual unspiked sample aliquots used for isotopic analyses. <sup>f</sup> Yield obtained for Pb extraction following separation and purification from seawater.

**Table S5.** Lead isotope compositions and concentrations determined for GEOTRACES intercalibration samples following different Pb separation and mass bias correction procedures.

| Sample                        | Pb separation                 | Mass bias corr. | <i>n</i> - IC <sup>a</sup> | <sup>206</sup> Pb/ <sup>204</sup> Pb ± 2SD <sup>b</sup> | <sup>207</sup> Pb/ <sup>204</sup> Pb ± 2SD <sup>b</sup> | <sup>208</sup> Pb/ <sup>204</sup> Pb ± 2SD <sup>b</sup> | <sup>206</sup> Pb/ <sup>207</sup> Pb ± 2SD <sup>b</sup> | <sup>208</sup> Pb/ <sup>207</sup> Pb ± 2SD <sup>b</sup> | Sample size (L) <sup>d</sup> | Meas. Pb (ng) <sup>e</sup> | Yield (mean) % <sup>f</sup> | <i>n</i> - ID <sup>a</sup> | [Pb] ± 1SD (pmol kg <sup>-1</sup> ) |   |            |
|-------------------------------|-------------------------------|-----------------|----------------------------|---------------------------------------------------------|---------------------------------------------------------|---------------------------------------------------------|---------------------------------------------------------|---------------------------------------------------------|------------------------------|----------------------------|-----------------------------|----------------------------|-------------------------------------|---|------------|
| <b>GDI</b>                    | Nobias                        | DS              | 1                          | 18.477 ± 01                                             | 15.626 ± 01                                             | 38.278 ± 04                                             | 1.1824 ± 00                                             | 2.4496 ± 01                                             | ~1                           | 5.2                        | 86                          | 1                          | 42.4                                |   |            |
|                               | Nobias                        | TI              | 1                          | 18.482 ± 01                                             | 15.634 ± 01                                             | 38.303 ± 03                                             | 1.1822 ± 00                                             | 2.4500 ± 01                                             |                              |                            |                             |                            |                                     |   |            |
|                               | TIMS <sup>1,2</sup>           | co-precip.      | 2                          | 18.460 ± 04                                             | 15.620 ± 03                                             | 38.255 ± 08                                             | 1.1818 ± 00                                             | 2.4491 ± 01                                             | ~2                           | 6.0                        | 50–55                       | 5                          | 45.7 ± 2.6                          |   |            |
|                               |                               |                 |                            | 18.489 ± 03                                             | 15.627 ± 03                                             | 38.298 ± 08                                             | 1.1831 ± 01                                             | 2.4506 ± 01                                             |                              |                            |                             |                            |                                     |   |            |
|                               | ± 2SE rel. (ppm) <sup>c</sup> |                 |                            |                                                         | ~190                                                    | ~200                                                    | ~210                                                    | ~30                                                     | ~30                          |                            |                             |                            |                                     |   |            |
| Consensus <sup>g</sup>        |                               |                 |                            |                                                         |                                                         |                                                         |                                                         |                                                         |                              |                            |                             |                            | 42.7 ± 1.5                          |   |            |
| <b>GSI</b>                    | Nobias                        | DS              | 1                          | 18.365 ± 02                                             | 15.634 ± 02                                             | 38.260 ± 05                                             | 1.1746 ± 00                                             | 2.4472 ± 01                                             | ~1                           | 3.1                        | 87                          | 1                          | 25.8                                |   |            |
|                               | Nobias                        | TI              | 1                          | 18.365 ± 02                                             | 15.634 ± 02                                             | 37.261 ± 04                                             | 1.1746 ± 00                                             | 2.4472 ± 01                                             |                              |                            |                             |                            |                                     |   |            |
|                               | TIMS <sup>1,2</sup>           | co-precip.      | 3                          | 18.356 ± 03                                             | 15.631 ± 03                                             | 38.237 ± 06                                             | 1.1744 ± 00                                             | 2.4463 ± 01                                             | ~2                           | 3.4                        | 45–60                       | 6                          | 27.9 ± 1.2                          |   |            |
|                               |                               |                 |                            | 18.347 ± 04                                             | 15.633 ± 03                                             | 38.237 ± 09                                             | 1.1736 ± 00                                             | 2.4458 ± 01                                             |                              |                            |                             |                            |                                     |   |            |
|                               | ± 2SE run (ppm) <sup>c</sup>  |                 |                            |                                                         | ~160                                                    | ~170                                                    | ~180                                                    | ~30                                                     | ~30                          |                            |                             |                            |                                     |   |            |
| Consensus <sup>g</sup>        |                               |                 |                            |                                                         |                                                         |                                                         |                                                         |                                                         |                              |                            |                             |                            | 28.6 ± 1.0                          |   |            |
| <b>GSP</b>                    | Nobias                        | DS              | 9                          | 18.075 ± 10                                             | 15.604 ± 07                                             | 38.192 ± 23                                             | 1.1584 ± 03                                             | 2.4476 ± 06                                             | ~0.2–0.7                     | 3.5                        | 76–96 (90)                  | 6                          | 58.7 ± 0.8                          |   |            |
| ± 2SD rel. (ppm) <sup>b</sup> |                               |                 |                            | 530                                                     | 450                                                     | 600                                                     | 280                                                     | 230                                                     |                              |                            |                             |                            |                                     |   |            |
| ± 2SE rel. (ppm) <sup>c</sup> |                               |                 |                            | 110                                                     | 120                                                     | 140                                                     | 30                                                      | 30                                                      |                              |                            |                             |                            |                                     |   |            |
|                               |                               |                 |                            |                                                         |                                                         |                                                         |                                                         |                                                         |                              |                            |                             |                            |                                     |   |            |
| Nobias                        |                               |                 | TI                         | 9                                                       | 18.069 ± 06                                             | 15.596 ± 07                                             | 38.167 ± 22                                             | 1.1586 ± 05                                             | 2.4472 ± 07                  |                            |                             |                            |                                     |   |            |
| ± 2SD rel. (ppm) <sup>b</sup> |                               |                 |                            | 310                                                     | 460                                                     | 590                                                     | 430                                                     | 180                                                     |                              |                            |                             |                            |                                     |   |            |
| ± 2SE rel. (ppm) <sup>c</sup> |                               |                 |                            | 100                                                     | 110                                                     | 120                                                     | 20                                                      | 20                                                      |                              |                            |                             |                            |                                     |   |            |
|                               |                               |                 |                            |                                                         |                                                         |                                                         |                                                         |                                                         |                              |                            |                             |                            |                                     |   |            |
| co-precip.                    |                               |                 | DS                         | 7                                                       | 18.076 ± 07                                             | 15.605 ± 05                                             | 38.194 ± 09                                             | 1.1584 ± 03                                             | 2.4476 ± 04                  | ~0.2–1.0                   | 3.8                         | 75–89 (81)                 |                                     |   |            |
| ± 2SD rel. (ppm) <sup>b</sup> |                               |                 |                            | 360                                                     | 310                                                     | 240                                                     | 220                                                     | 50                                                      |                              |                            |                             |                            |                                     |   |            |
| ± 2SE rel. (ppm) <sup>c</sup> |                               |                 |                            | 230                                                     | 260                                                     | 290                                                     | 50                                                      | 50                                                      |                              |                            |                             |                            |                                     |   |            |
|                               |                               |                 |                            |                                                         |                                                         |                                                         |                                                         |                                                         |                              |                            |                             |                            |                                     |   |            |
| co-precip.                    |                               |                 | TI                         | 7                                                       | 18.075 ± 20                                             | 15.602 ± 21                                             | 38.187 ± 66                                             | 1.1584 ± 04                                             | 2.4475 ± 10                  |                            |                             |                            |                                     |   |            |
| ± 2SD rel. (ppm) <sup>b</sup> |                               |                 |                            | 1080                                                    | 1340                                                    | 1720                                                    | 330                                                     | 390                                                     |                              |                            |                             |                            |                                     |   |            |
| ± 2SE rel. (ppm) <sup>c</sup> |                               |                 |                            | 180                                                     | 190                                                     | 190                                                     | 20                                                      | 20                                                      |                              |                            |                             |                            |                                     |   |            |
|                               |                               |                 |                            |                                                         |                                                         |                                                         |                                                         |                                                         |                              |                            |                             |                            |                                     |   |            |
| TIMS <sup>7</sup>             |                               |                 | co-precip.                 | DS                                                      | 4                                                       | 18.072 ± 07                                             | 15.601 ± 04                                             | 38.183 ± 10                                             | 1.1584 ± 01                  | 2.4475 ± 03                | ~0.5–2.0                    | 7.3                        | 84–97 (91)                          | 5 | 56.3 ± 1.7 |
| ± 2SD rel. (ppm) <sup>b</sup> |                               |                 |                            | 390                                                     | 270                                                     | 260                                                     | 120                                                     | 110                                                     |                              |                            |                             |                            |                                     |   |            |
| ± 2SE rel. (ppm) <sup>c</sup> |                               |                 |                            | 150                                                     | 150                                                     | 160                                                     | 30                                                      | 20                                                      |                              |                            |                             |                            |                                     |   |            |
| Consensus <sup>g</sup>        |                               |                 |                            |                                                         |                                                         |                                                         |                                                         |                                                         |                              |                            |                             |                            | 60.5 ± 5.0                          |   |            |

<sup>a</sup> Number of individual sample aliquots analysed for Pb isotope compositions or Pb concentrations using the ID technique. <sup>b</sup> 2 x standard deviation (2SD) calculated from individual results for *n* sample aliquots analysed across several batches of measurements (i.e., long-term reproducibility) with the relative 2SD (ppm) provided below; for samples with *n* ≤ 3, the individual data are provided and the error corresponds to 2 x standard error (2SE) of the mean based on individual results during measurement cycles (i.e., within-run reproducibility). <sup>c</sup> The relative 2SE (ppm) of the mean based on the average 2SE of individual results during measurement cycles. <sup>d</sup> Volume of individual sample aliquots used for Pb isotope analyses. <sup>e</sup> Mean mass of Pb in individual unspiked sample aliquots used for isotopic analyses. <sup>f</sup> Yield obtained for Pb extraction following separation and purification from seawater. <sup>g</sup> Consensus values for Pb concentrations were obtained from GEOTRACES programme ([www.geotraces.org/standards-and-reference-materials](http://www.geotraces.org/standards-and-reference-materials)). For the intercalibration sample GSP, the concentration was converted from pmol L<sup>-1</sup> to pmol kg<sup>-1</sup> by assuming a seawater density of ρ = 1025 kg m<sup>-3</sup>.

## REFERENCES

- (1) Paul, M.; Bridgestock, L. J.; Rehkämper, M.; van de Flierdt, T.; Weiss, D. High-Precision Measurements of Seawater Pb Isotope Compositions by Double Spike Thermal Ionization Mass Spectrometry. *Anal. Chim. Acta* **2015**, *863*, 59–69.
- (2) Bridgestock, L. J. Tracing the Cycling of Pb and Cd from Natural and Anthropogenic Sources through the Troposphere and Ocean. *Doctoral dissertation*, Imperial College London, U.K. **2015**, 1–182.
- (3) Galer, S. J. G.; Abouchami, W. Practical Application of Lead Triple Spiking for Correction of Instrumental Mass Discrimination. *Mineral. Mag.* **1998**, *62A* (1), 491–492.
- (4) Taylor, R. N.; Ishizuka, O.; Michalik, A.; Milton, J. A.; Croudace, I. W. Evaluating the Precision of Pb Isotope Measurement by Mass Spectrometry. *J. Anal. At. Spectrom.* **2015**, *30* (1), 198–213.
- (5) Klaver, M.; Smeets, R. J.; Koornneef, J. M.; Davies, G. R.; Vroon, P. Z. Pb Isotope Analysis of ng Size Samples by TIMS Equipped with a  $10^{13} \Omega$  Resistor Using a  $^{207}\text{Pb}$ - $^{204}\text{Pb}$  Double Spike. *J. Anal. At. Spectrom.* **2016**, *31* (1), 171–178.
- (6) Fukami, Y.; Tobita, M.; Yokoyama, T.; Usui, T.; Moriwaki, R. Precise Isotope Analysis of Sub-Nanogram Lead by Total Evaporation Thermal Ionization Mass Spectrometry (TE-TIMS) Coupled with a  $^{204}\text{Pb}$ - $^{207}\text{Pb}$  Double Spike Method. *J. Anal. At. Spectrom.* **2017**, *32* (4), 848–857.
- (7) Murphy, K. Isotopic Studies in Marine Geochemistry. *Doctoral dissertation*, Imperial College London, U.K. **2016**, 1–167.
